# Supplementary material
Source: PubMed Central journal article supplement (PMC4303532)

Table of Contents entry:

High resolution X-ray study provides new insight for the enigmatic ripple phase in lipid bilayers.

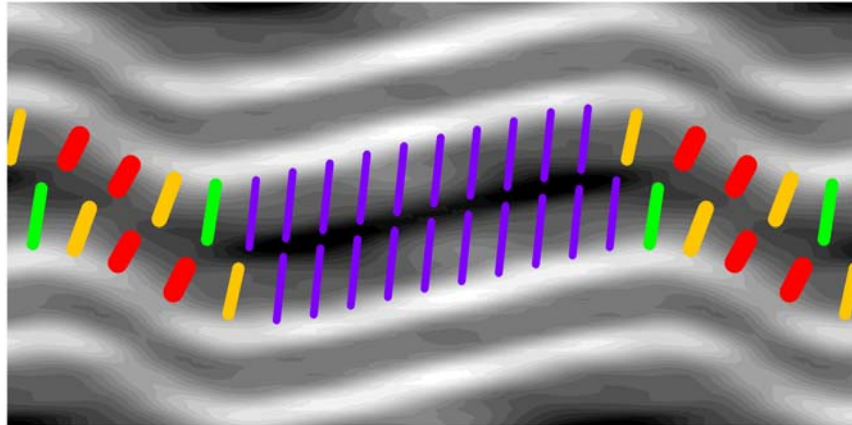

Supplement: NIHMS649994-supplement-Table_of_Contents_entry.pdf [file NIHMS649994-supplement-Table_of_Contents_entry.pdf]
